# Supplementary material for: Non-coding RNAs in the pathogenesis of COPD
Source: HighWire-hosted journal article supplement (doi:10.1136/thoraxjnl-2014-206560), 2015-05-20
Supplement: thoraxjnl-2014-206560supp_table1.pdf [file thoraxjnl-2014-206560supp_table1.pdf]

**Supplemental Table 1**

| <u>Study</u>                              | <u>Study Groups</u>                                                    | <u>Smoking status</u>                                                                | <u>Sample Size</u>   | <u>Pack-years</u>                                                                | <u>Type of Tissue studied</u>     | <u>Disease stage</u>    | <u>Definition of disease</u>                             | <u>Assay method</u>                           | <u>Experimental validation</u>                                                |
|-------------------------------------------|------------------------------------------------------------------------|--------------------------------------------------------------------------------------|----------------------|----------------------------------------------------------------------------------|-----------------------------------|-------------------------|----------------------------------------------------------|-----------------------------------------------|-------------------------------------------------------------------------------|
| <b>Schembri et al<sup>17</sup></b>        | never-smoker smokers                                                   | current smokers                                                                      | 10<br>10             | 0<br>18.8 ± 16                                                                   | bronchial airway epithelial cells | no COPD                 | not applicable                                           | microRNA microarray                           | RT-PCR (4 miRNAs)                                                             |
| <b>Van Pottelberge et al<sup>10</sup></b> | never-smokers smokers<br>smokers with COPD                             | current smokers<br>current smokers                                                   | 10<br>10<br>12       | 0<br>44.6 ± 28.6<br>62.2 ± 25.1                                                  | induced sputum                    | GOLD stages I and II    | GOLD criteria (FEV <sub>1</sub> /FVC < 0.70)             | microRNA RT-qPCR                              | validation in an independent patient cohort (41 patients)                     |
| <b>Molina-Pinelo et al<sup>18</sup></b>   | Controls<br>COPD<br>Adenocarcinoma<br>COPD and adenocarcinoma          | 15 current smokers<br>12 current smokers<br>18 current smokers<br>13 current smokers | 16<br>23<br>27<br>21 | 40.0 (30.0-56.2)*<br>54.0 (40.0-75.0) *<br>60.0 (37.5-75) *<br>54.5 (40.0-67.5)* | BAL fluid                         | GOLD stages I to IV     | GOLD criteria                                            | microRNA microarray                           | RT-PCR (11 miRNAs). validation in an independent patient cohort (40 patients) |
| <b>Sato et al<sup>33</sup></b>            | Control<br>COPD                                                        | 6 current smokers<br>6 current smokers                                               | 16<br>14             | 43.2 ± 7.6 <sup>1</sup><br>43.7 ± 4.3 <sup>1</sup>                               | fibroblasts                       | GOLD stages I to IV     | GOLD criteria (FEV <sub>1</sub> )                        | microRNA microarray                           | RT-PCR and Northern blot (1 miRNA)                                            |
| <b>Ezzie et al<sup>27</sup></b>           | Healthy smokers<br>GOLD I<br>GOLD II<br>GOLD IV                        | not specified                                                                        | 9<br>7<br>9<br>10    | 25.67 ± 16.70<br>41.86 ± 23.26<br>44.00 ± 20.15<br>56.40 ± 36.42                 | lung tissue                       | GOLD stage I, II and IV | GOLD criteria (FEV <sub>1</sub> )                        | microRNA microarray                           | RT-PCR (4 microRNAs)                                                          |
| <b>Graff et al<sup>23</sup></b>           | never-smoker smokers                                                   | current smokers                                                                      | 12<br>16             | 0<br>> 10 years                                                                  | alveolar macrophages              | no COPD                 | not applicable                                           | RT-PCR array                                  | 2 cohorts. RT-PCR (3 miRNAs)                                                  |
| <b>Hassan et al<sup>44</sup></b>          | Control<br>COPD                                                        | not specified                                                                        | 4<br>4               | not specified                                                                    | lung tissue                       | GOLD stage IV           | GOLD criteria (FEV <sub>1</sub> . FEV <sub>1</sub> /FVC) | in situ hybridization                         | /                                                                             |
| <b>Hassan et al<sup>49</sup></b>          | asymptomatic MM<br>asymptomatic ZZ<br>symptomatic MM<br>symptomatic ZZ | not specified                                                                        | 8<br>11<br>7<br>11   | 0<br>0<br>29 ± 13.1 <sup>1</sup><br>18.6 ± 11.2 <sup>1</sup>                     | peripheral blood monocytes        | not specified           | not specified                                            | RT-PCR/<br>nCounter<br>miRNA<br>hybridization | /                                                                             |

## Supplemental Table 1 (Continued)

| <u>Study</u>                          | <u>Study Groups</u>                                              | <u>Smoking status</u>                                                            | <u>Sample Size</u>   | <u>Pack-years</u>                              | <u>Type of Tissue studied</u>     | <u>Disease stage</u>                                       | <u>Definition of disease</u>                                                                                                  | <u>Assay method</u>      | <u>Experimental validation</u> |
|---------------------------------------|------------------------------------------------------------------|----------------------------------------------------------------------------------|----------------------|------------------------------------------------|-----------------------------------|------------------------------------------------------------|-------------------------------------------------------------------------------------------------------------------------------|--------------------------|--------------------------------|
| <b>Mizuno et al<sup>57</sup></b>      | no COPD<br>mild COPD<br>moderate COPD<br>severe COPD             | 0 current smokers<br>2 current smokers<br>0 current smokers<br>0 current smokers | 10<br>13<br>17<br>15 | 0<br>30.4 ± 32.2<br>32.4 ± 35.2<br>43.2 ± 38.6 | lung tissue                       | GOLD stages I to IV                                        | GOLD criteria                                                                                                                 | RT-PCR                   | /                              |
| <b>Savarimuthu et al<sup>63</sup></b> | mild emphysema<br>moderate emphysema                             | ex-smokers<br>ex-smokers                                                         | 9<br>20              | 62 ± 34<br>75 ± 49                             | lung tissue                       | mild versus moderate emphysema<br><br>GOLD stages I and II | mild emphysema: > 75% predicted KCO, moderate emphysema: 40-75% predicted KCO<br>GOLD criteria (FEV <sub>1</sub> /FVC < 0.70) | microRNA microarray      | RT-PCR (2 microRNAs)           |
| <b>Christenson et al<sup>52</sup></b> | COPD IV<br>Controls                                              | former smokers<br>former smoker<br>never-smoker                                  | 6<br>1<br>1          | 35 ± 23.66<br>24<br>0                          | lung tissue                       | GOLD stage IV, degree of emphysema measured by Lm          | GOLD criteria (FEV <sub>1</sub> < 0.25 predicted)                                                                             | microRNA microarray      | RT-PCR (8 miRNAs)              |
| <b>Chatila et al<sup>50</sup></b>     | healthy non-smokers<br>smokers without COPD<br>smokers with COPD | current smokers<br>current smokers                                               | 12<br>12<br>12       | 0<br>> 10 years                                | T regulatory and T effector cells | GOLD stages I to IV                                        | GOLD criteria (FEV <sub>1</sub> /FVC < 0.70)                                                                                  | microRNA microarray      | RT-PCR (1 miRNA)               |
| <b>Bi et al<sup>81</sup></b>          | non-smokers<br>smokers without COPD<br>smokers with COPD         | current smokers<br>current smokers                                               | 3<br>5<br>5          | 0<br>23.7 ± 1.4<br>29.8 ± 2.3                  | lung tissue                       | not specified                                              | not specified                                                                                                                 | lncRNA + mRNA microarray | RT-PCR (14 lncRNAs)            |

The number of pack-years smoked is represented as mean ± SD, unless otherwise indicated.

\*median (interquartile range)

<sup>1</sup> mean ± SEM
