# Supplementary material for: Non-coding RNAs in the pathogenesis of COPD
Source: HighWire-hosted journal article supplement (doi:10.1136/thoraxjnl-2014-206560), 2015-05-20
Supplement: thoraxjnl-2014-206560supp_table2.pdf [file thoraxjnl-2014-206560supp_table2.pdf]

## Supplemental Table 2: miRNA profiling in rodent models

| <b>Study</b>          | <b>Outcome</b>                                                                                                                                           | <b>Species</b> | <b>Genetic background</b> | <b>Number of animals</b>                                                                                                                                                                                                                 | <b>Exposure</b>                                                                                                                                                                                                                                                                     |
|-----------------------|----------------------------------------------------------------------------------------------------------------------------------------------------------|----------------|---------------------------|------------------------------------------------------------------------------------------------------------------------------------------------------------------------------------------------------------------------------------------|-------------------------------------------------------------------------------------------------------------------------------------------------------------------------------------------------------------------------------------------------------------------------------------|
| Izzotti <sup>22</sup> | Exposure to CS at 438 mg/m <sup>3</sup> TPM (1 day) results in differential expression of 32 miRNAs, most are downregulated compared to sham             | Mouse          | Swiss ICR (CD-1)          | 75 newborn mice and seven dams, divided into 7 groups                                                                                                                                                                                    | 1) sham<br>2) CS, TPM 119 mg/m <sup>3</sup> (1 day)<br>3) CS, TPM 292 mg/m <sup>3</sup> (1 day)<br>4) CS, TPM 438 mg/m <sup>3</sup> (1 day)<br>5) CS, TPM 438 mg/m <sup>3</sup> (1 week)<br>6) CS, TPM 438 mg/m <sup>3</sup> (4 weeks)<br>7) CS, TPM 631 mg/m <sup>3</sup> (lethal) |
| Izzotti <sup>25</sup> | 2-fold downregulation of 126 miRNAs (26%), a.o. let-7c, miR-34c and miR-34b and upregulation of 7 miRNAs (1.4%) after ECS exposure                       | Rat            | Sprague-Dawley            | 16 rats, divided into 2 groups                                                                                                                                                                                                           | 1) sham<br>2) CS, 28 days                                                                                                                                                                                                                                                           |
| Izzotti <sup>26</sup> | Differential expression of 15 miRNAs after exposure to ECS or to ECS + light compared with either sham or light exposure, a.o. downregulation of miR-34b | Mouse          | Swiss CD-1 albino         | 10 postweanling mice (5 males and 5 females) and 7 dams<br>10 postweanling mice (5 males and 5 females) and 7 dams<br>10 postweanling mice (5 males and 5 females) and 5 dams<br>10 postweanling mice (5 males and 5 females) and 5 dams | 1) sham<br>2) ECS<br>3) light<br>4) ECS + light                                                                                                                                                                                                                                     |

(E)CS= (environmental) cigarette smoke, TPM= total particulate matter, a.o.= amongst others
